# Supplementary material for: Intravenous injectable metformin-Cu(ii)-EGCG coordination polymer nanoparticles for electrothermally enhanced dual-drug synergistic tumor therapy
Source: Royal Society of Chemistry journal article supplement (doi:10.1039/d4tb01017e), 2024-01-01
Supplement: d4tb01017e1.pdf [file d4tb01017e1.pdf]

## Supporting information

### **Intravenous injectable Metformin-Cu(II)-EGCG coordination polymer nanoparticles for electrothermal-enhanced dual-drug synergistic tumor therapy**

Jingran Di, Chenqi Huang, Chenyu Zhao, Siyuan Luo, Rong Wang, Shuai Zhang,  
Hongrui Zhu, Daocheng Wu \*

Key Laboratory of Biomedical Information Engineering of Education Ministry, School  
of Life Science and Technology, Xi'an Jiaotong University, Xi'an 710049, China

\* Corresponding authors.

E-mail addresses: [wudaocheng@mail.xjtu.edu.cn](mailto:wudaocheng@mail.xjtu.edu.cn)

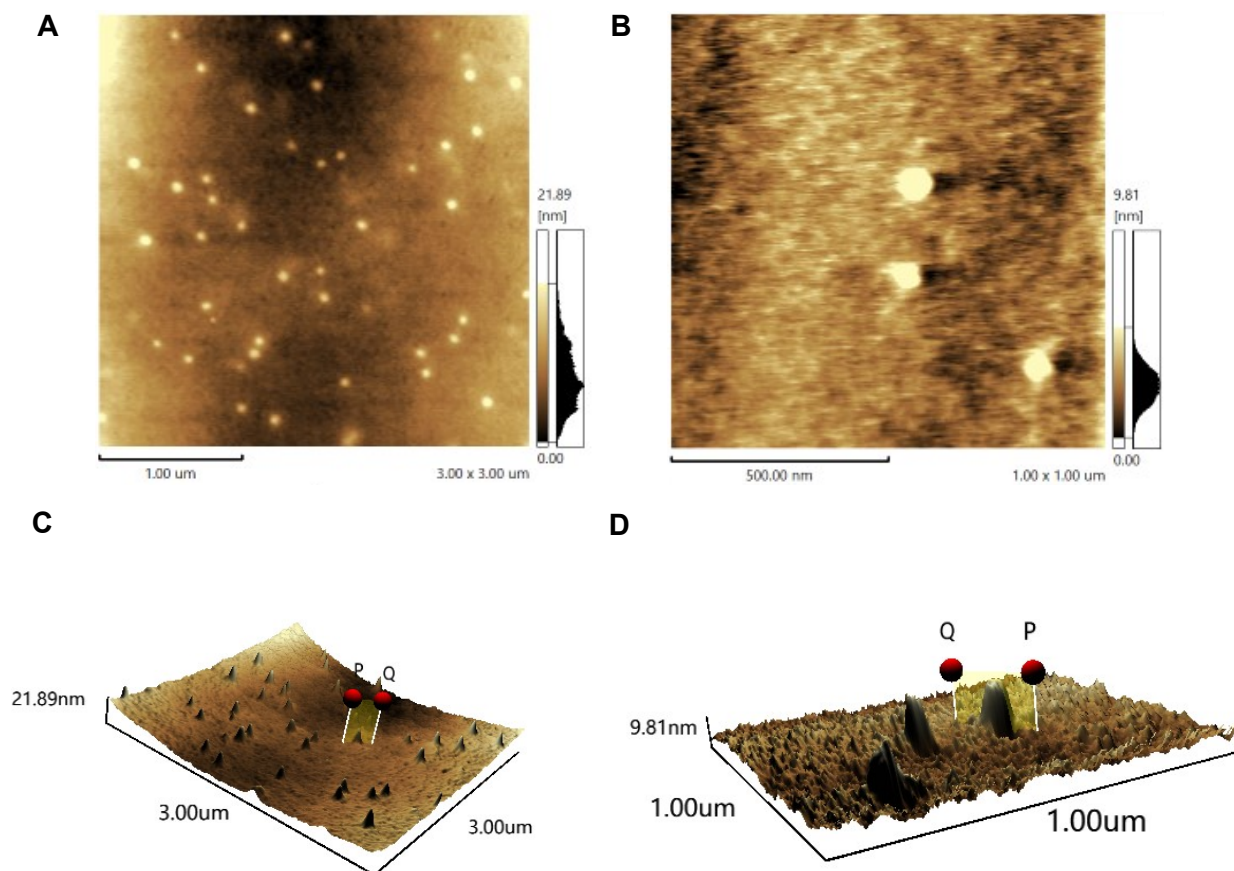

**Fig.S1.** AFM results of Metformin-Cu (II) -EGCG ICP NPs ( Resolution: XY-0.2 nm; Z : 0.01 nm ) . (A) 2D images of AFM results of Metformin-Cu (II) -EGCG ICP NPs(3 $\mu\text{m}$  $\times$ 3 $\mu\text{m}$ ). (B) 2D images of AFM results of Metformin-Cu (II) -EGCG ICP NPs(1 $\mu\text{m}$  $\times$ 1 $\mu\text{m}$ ). (C) 3D images of AFM results of Metformin-Cu (II) -EGCG ICP NPs(3 $\mu\text{m}$  $\times$ 3 $\mu\text{m}$ ). (D) 3D images of AFM results of Metformin-Cu (II) -EGCG ICP NPs(1 $\mu\text{m}$  $\times$ 1 $\mu\text{m}$ ).

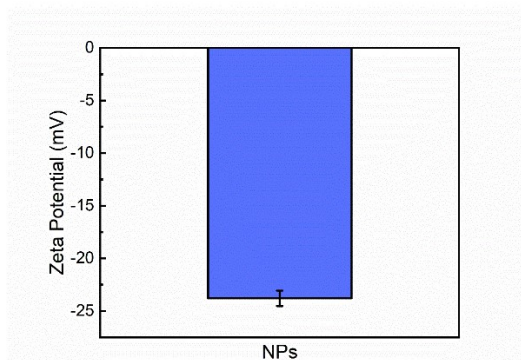

**Fig.S2.** Zeta potential results of Metformin-Cu(II)-EGCG ICP NPs (n = 3).

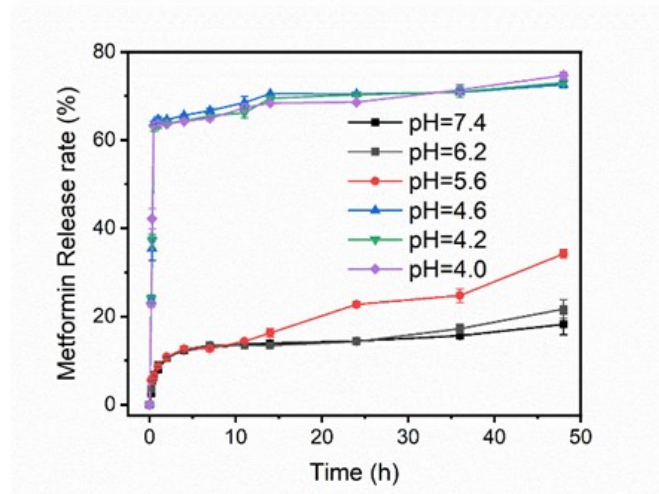

**Fig.S3.** Metformin release rate under different pH values (n = 3).

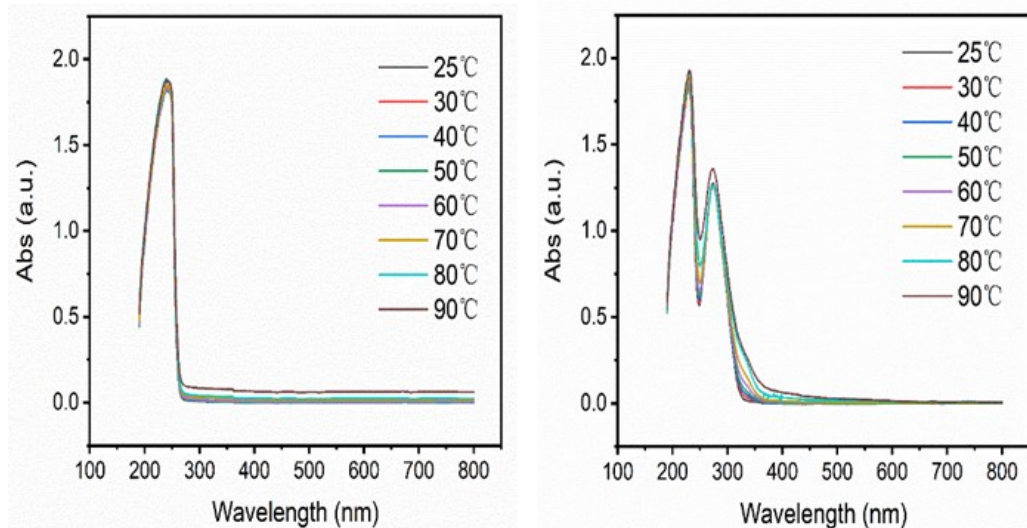

**Fig.S4.** Temperature stability of Free Metformin and EGCG.

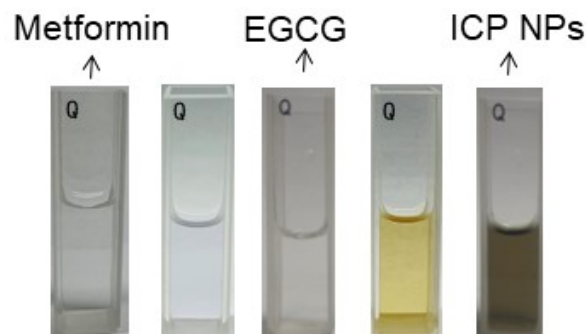

**Fig.S5.** Photographs of Metformin, Metformin-Cu(II), EGCG, EGCG- Cu(II), Metformin-Cu(II)-EGCG ICP NPs (from left to right).

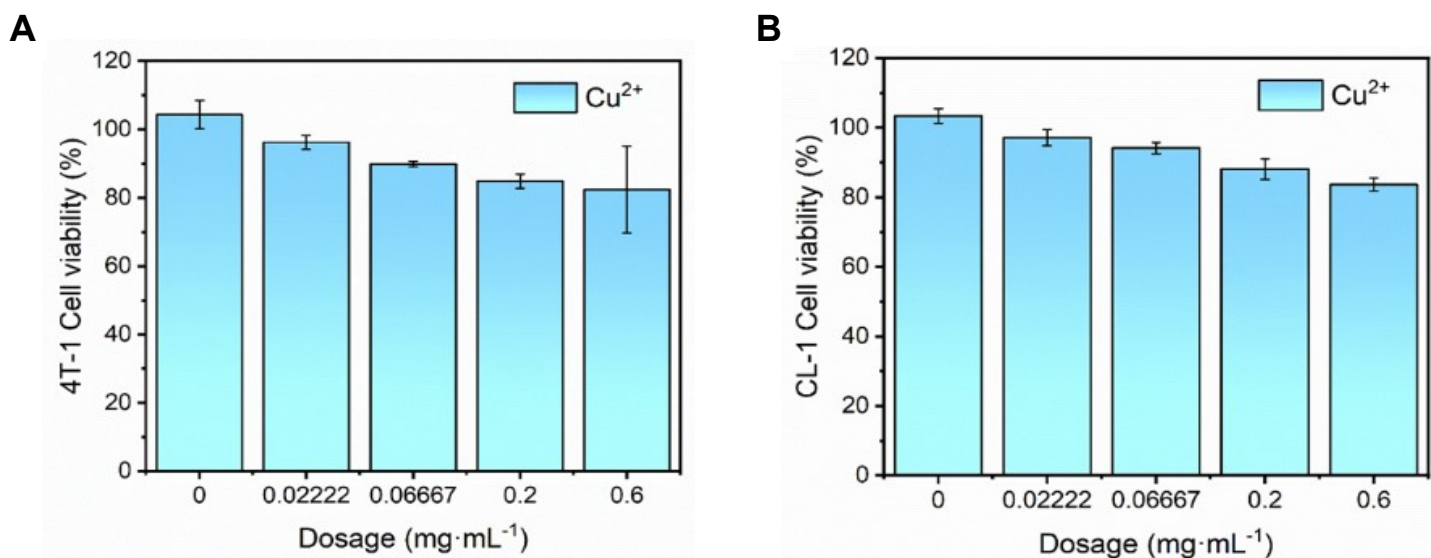

**Fig.S6.** (A) Viability of 4T-1 cells with different dosages of Cu<sup>2+</sup>. (B) Viability of CL-1 cells with different dosages of Cu<sup>2+</sup>.

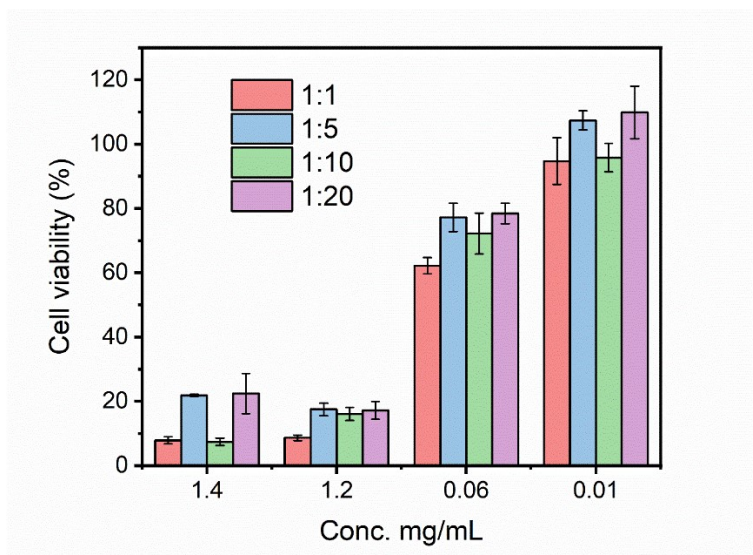

**Fig.S7.** Optimization of the synergistic therapeutic strategy mediated by Metformin-Cu(II)-EGCG ICP NPs.



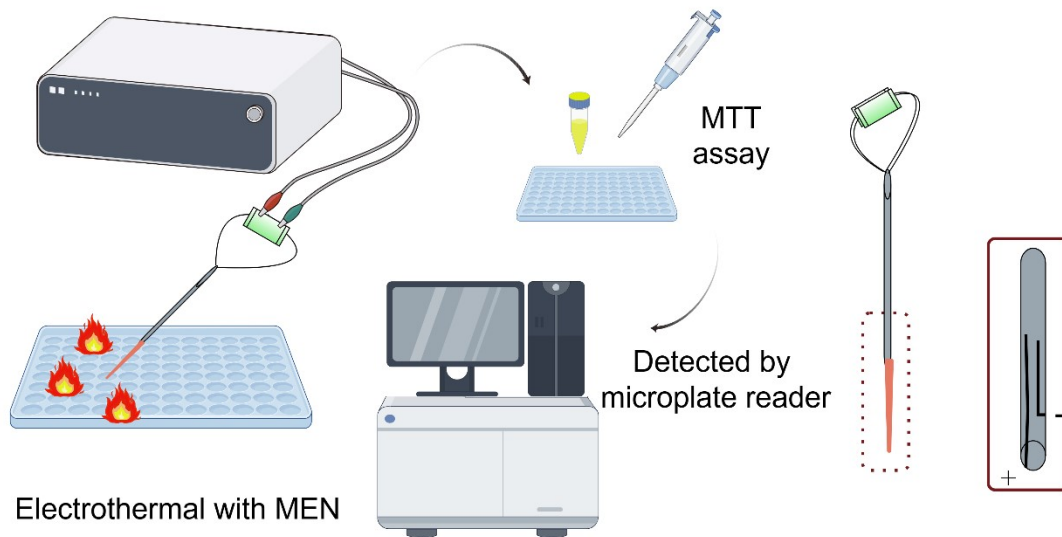

**Fig.S8.** Schematic diagram of micro-electrothermal needle (MEN) in cell experiments.

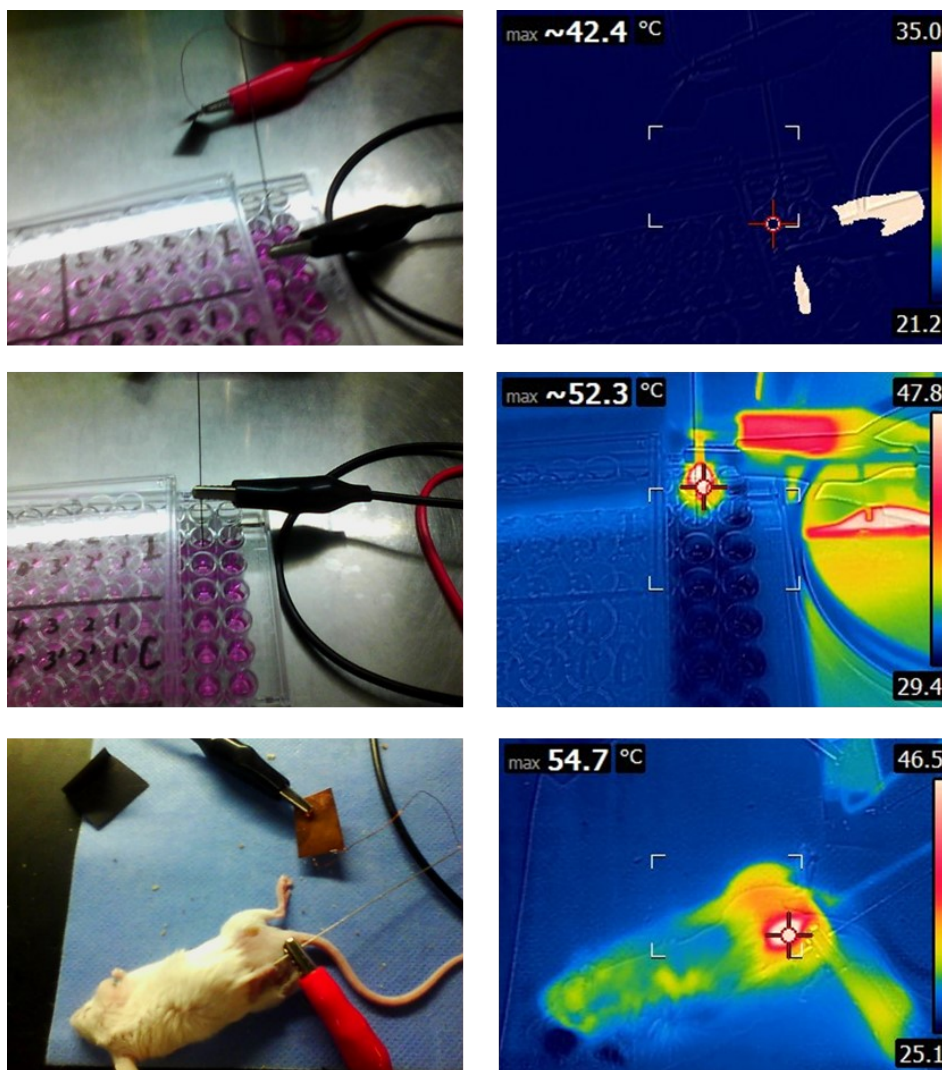

**Fig.S9.** Infrared thermal images in cell and animal experiments.

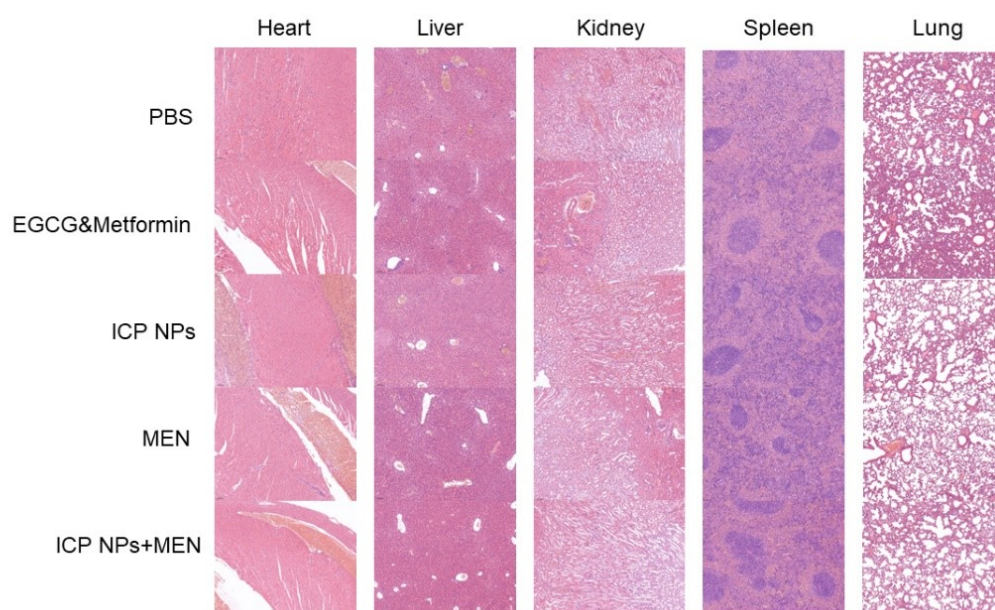

**Fig.S10.** Histological analysis after different treatments (Heart, Liver, Kidney, Spleen, and Lung). Drug group:1) PBS, 2) free EGCG and Metformin, 3) Metformin-Cu(II)-EGCG ICP NPs, 4) MEN, and 5) Metformin-Cu(II)-EGCG ICP NPs+MEN.

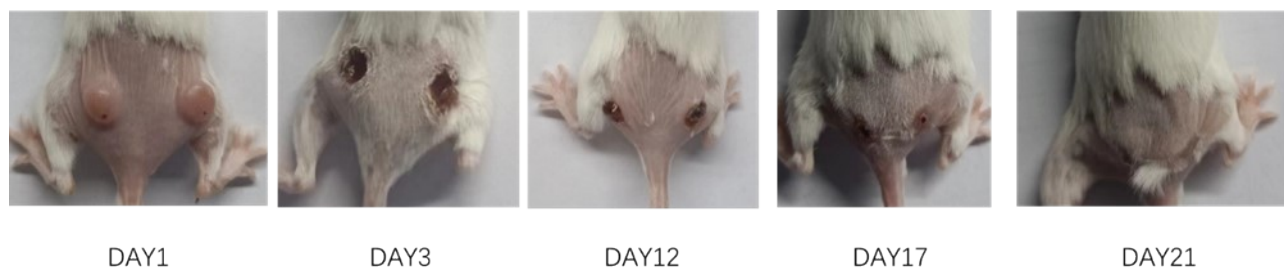

**Fig.S11.** Pictures of mice during the treatment process.

**Table.S1.** The binding energy of different samples

| Sample                            | $E_b / \text{eV}$ |        |        |        |        |           |        |           |        |
|-----------------------------------|-------------------|--------|--------|--------|--------|-----------|--------|-----------|--------|
|                                   | O 1s              |        | N 1s   |        |        | Cu 2p     |        |           |        |
|                                   |                   |        |        |        |        | Cu 2p 3/2 |        | Cu 2p 1/2 |        |
| CuCl <sub>2</sub>                 |                   |        |        |        |        | 935.05    |        | 954.77    |        |
| EGCG                              | 530.10            | 531.70 |        |        |        |           |        |           |        |
| Metformin                         |                   |        | 397.56 | 398.63 | 406.10 |           |        |           |        |
| Metformin-Cu(II)-<br>EGCG ICP NPs | 531.11            | 532.80 | 398.74 | 400.27 | 406.00 | 934.48    | 935.51 | 952.47    | 954.98 |

**Table.S2.** Death status of different groups of mice in acute toxicity experiments

| Group                                                         | Number of<br>animals | Number of deaths<br>(pieces) | Survival<br>count | Mortality rate<br>(%) | Survival<br>rate (%) |
|---------------------------------------------------------------|----------------------|------------------------------|-------------------|-----------------------|----------------------|
| EGCG (30mg · kg <sup>-1</sup> )                               | 8                    | 0                            | 8                 | 0                     | 100                  |
| Metformin (100 mg · kg <sup>-1</sup> )                        | 8                    | 0                            | 8                 | 0                     | 100                  |
| EGCG & Metformin (30<br>mg · kg <sup>-1</sup> )               | 8                    | 0                            | 8                 | 0                     | 100                  |
| Metformin-Cu (II)-EGCG<br>ICP NPs (40 mg · kg <sup>-1</sup> ) | 8                    | 0                            | 8                 | 0                     | 100                  |
| PBS                                                           | 8                    | 0                            | 8                 | 0                     | 100                  |
